# Supplementary material for: Astragalus mongholicus polysaccharides ameliorate hepatic lipid accumulation and inflammation as well as modulate gut microbiota in NAFLD rats
Source: Royal Society of Chemistry journal article supplement (doi:10.1039/d2fo01009g), 2022-01-01
Supplement: d2fo01009g3.pdf [file d2fo01009g3.pdf]

## Supplementary Material

### 1 Supplementary Data

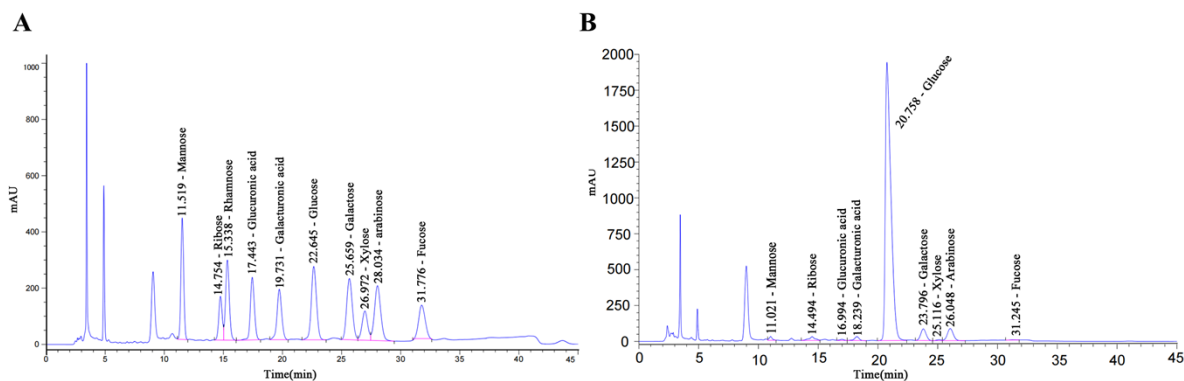

**Supplementary Figure 1.** Ion chromatogram data of monosaccharide composition. (A) Standard curve. (B) Sample determination curve.

#### 1.1 Supplementary Tables

##### Supplementary Table 1. Primer sequences

| Gene           | Forward                     | Reverse                     |
|----------------|-----------------------------|-----------------------------|
| AMPK           | 5'-CCTGAAGCCAGAGAACGTGT     | 5'-TGGCGATCCACAGCTAGTTC     |
| SREBP-1        | 5'-GCGTTTCTACCACTTCAGGTTTCA | 5'-ACCCTGCGAAGTGCTCACAA     |
| PPAR- $\alpha$ | 5'-CACCTCTCTCCAGCTTCCA      | 5'-GCCTTGCCCCACATATTTCG     |
| TLR4           | 5'-TGAGGACTGGGTGAGAAATGAGC  | 5'-CTGCCATGTTTTGAGCAATCTCAT |
| NLRP3          | 5'-GTGGAGATCCTAGGTTTCTCTG   | 5'-CAGGATCTCATTCTCTTGATC    |
| TNF- $\alpha$  | 5'-ATCGGTCCCAACAAGGAGGA     | 5'-TCCGCTTGGTGGTTTGCTAC     |
| IL-1 $\beta$   | 5'-TGCTGTCTGACCCATGTGAG     | 5'-GTCGTTGCTTGTCTCTCCTTG    |
| ZO-1           | 5'-TAATGCCCGAGCTCCGATG      | 5'-CCATCTTTGGACCGATTGCTG    |
| Occludin       | 5'-GCCATACATGTCATTGCTTGGTG  | 5'-TTGGGAGCCTTGACATCTTGTTTC |
| GRP41          | 5'-CCCCTTGACAGGCCACATAG     | 5'-TGGTATGACTGCCTTGAGCG     |

|       |                         |                          |
|-------|-------------------------|--------------------------|
| GRP43 | 5'-GGCTGTGGTGACGCTTCTTA | 5'-CATAGAGGAGCCGGGATTGC  |
| Actin | 5'-CGCGAGTACAACCTTCTTGC | 5'-ATACCCACCATCACACCCTGG |

---

**Supplementary Table 2.** Composition of crude polysaccharides.

| Sample     | Polysaccharides | Protein | Flavone | Ursolic acid | Saponin |
|------------|-----------------|---------|---------|--------------|---------|
| Content(%) | 71.01           | 3.28    | 6.63    | 1.45         | 2.87    |

---
