# Supplementary figures and images for: Astragalus mongholicus polysaccharides ameliorate hepatic lipid accumulation and inflammation as well as modulate gut microbiota in NAFLD rats
Source: Royal Society of Chemistry journal article supplement (doi:10.1039/d2fo01009g), 2022-01-01

**A**

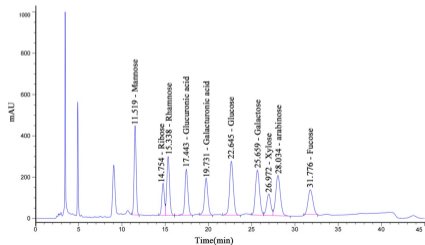

**B**

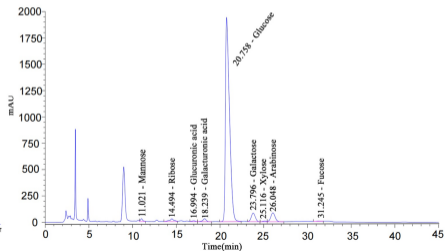

Supplement: d2fo01009g2.pdf [file d2fo01009g2.pdf]
